# Supplementary material for: Ferrocene-modified polymer-SWCNT composite films for high-performance flexible thermoelectric generators
Source: Royal Society of Chemistry journal article supplement (doi:10.1039/d4ta02037e), 2024-01-01
Supplement: d4ta02037e1.pdf [file d4ta02037e1.pdf]

# Electronic supplementary information

## **Ferrocene-modified polymer-SWCNTs composite film for high-performance flexible thermoelectric generators**

Zelin Sun<sup>a,b,†</sup>, Zhifeng Ma<sup>c,†</sup>, Xuan Zhou<sup>d</sup>, Yanzhao Wang<sup>b,f</sup>, Jie Zhang<sup>e</sup>, and Wai-Yeung Wong<sup>a,b,\*</sup>

<sup>a</sup>Department of Applied Biology and Chemical Technology and Research Institute for Smart Energy, The Hong Kong Polytechnic University, Hung Hom, Hong Kong, P. R. China

<sup>b</sup>The Hong Kong Polytechnic University Shenzhen Research Institute, Shenzhen 518057, P. R. China

<sup>c</sup>School of Chemistry and Environment, Yunnan Key Laboratory of Chiral Functional Substance Research and Application, Yunnan Minzu University, Kunming 650504 Yunnan, P. R. China

<sup>d</sup>Machine Vision Inspection Laboratory & School of Sino-Germany Intelligent Production. Shenzhen Institute of Technology, Shenzhen 518057, P. R. China

<sup>e</sup>Department of Chemistry, School of Pharmaceutical and Chemical Engineering, Taizhou University, Jiaojiang 318000, Zhejiang, China

<sup>f</sup>School of Chemical and Environmental Engineering, Shanghai Institute of Technology, Shanghai 201418, China

<sup>†</sup>Z.S. and Z.M. contributed equally to this work.

E-mail address: wai-yeung.wong@polyu.edu.hk

## 1. SEM measurement

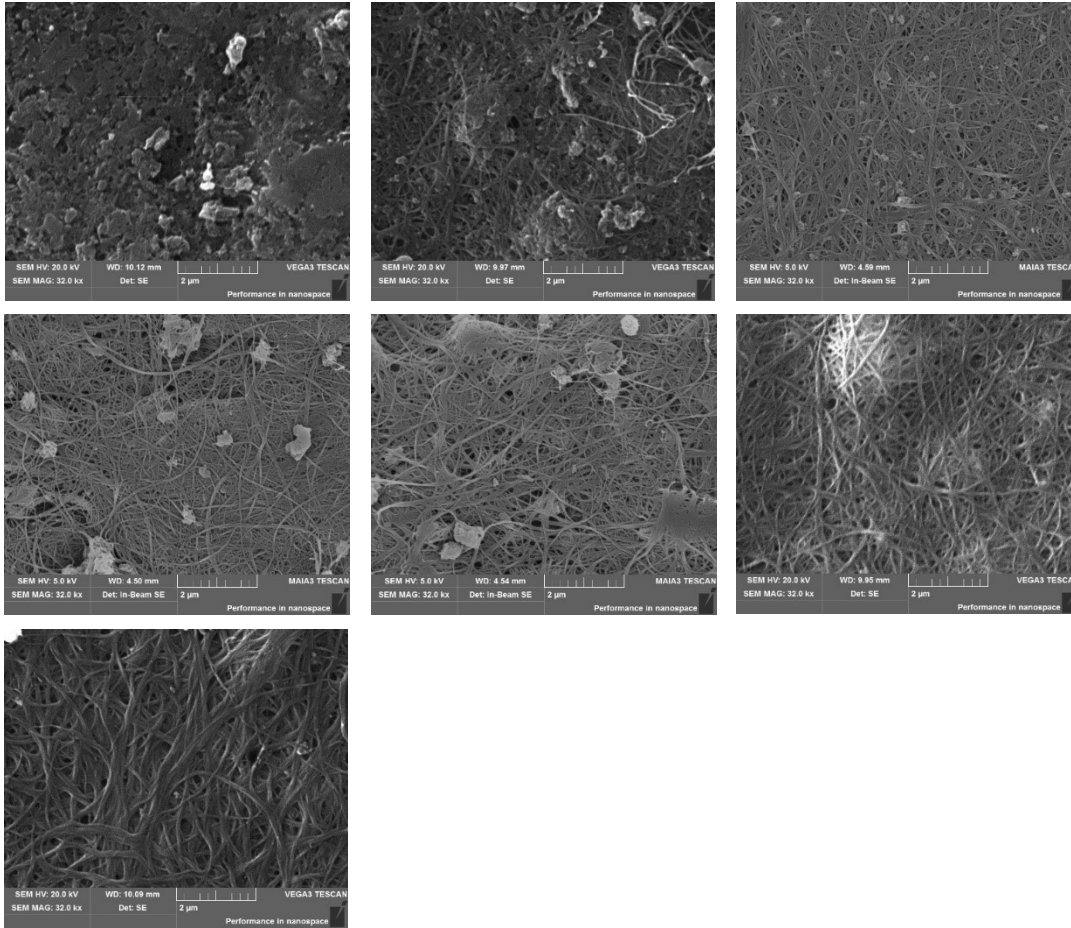

**Figure S1.** SEM images for the surface morphology of (a-c) **Fc-P2/SWCNT** composite films with various SWCNT mass loadings ( $f_c$ ): (a)  $f_c = 30\%$ , (b)  $f_c = 60\%$ , (c)  $f_c = 90\%$ ; (d-f) **Fc-P3/SWCNT** composite films with various SWCNT mass loadings ( $f_c$ ): (d)  $f_c = 30\%$ , (e)  $f_c = 60\%$ , (f)  $f_c = 90\%$ ; and (g) the pure SWCNT film.

## 2. XRD measurement

Diffraction peaks located around  $2\theta = 26^\circ$  are present in their XRD patterns, indicating the amorphous nature of the metallopolymer.

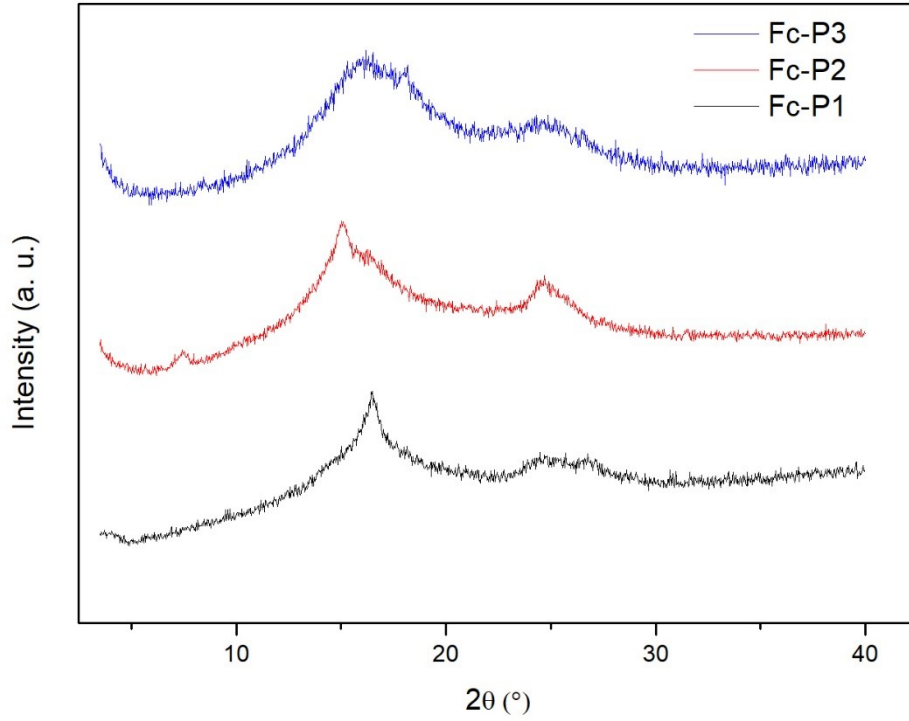

**Figure S2.** XRD of Fc-P1, Fc-P2, Fc-P3.

### 3. Thermoelectric parameters of the composites

In testing the thermoelectric performance of the composite films, we ensured the reliability of our experiments by preparing three different films for each data set using the same method.

**Table S1** Summary of the thermoelectric parameters of the composites.

| films       | SWCNT doping ratio ( $f_c$ ) | $\sigma$ (S/cm)  | $S$ ( $\mu\text{V}\cdot\text{K}^{-1}$ ) | $PF$ [ $\mu\text{W m}^{-1} \text{K}^{-2}$ ] |
|-------------|------------------------------|------------------|-----------------------------------------|---------------------------------------------|
| SWCNT       |                              | $741.9 \pm 11.2$ | $35.5 \pm 0.3$                          | $93.2 \pm 0.4$                              |
| SWCNT-Fc-P1 | 15 %                         | $107.5 \pm 7.9$  | $69.4 \pm 0.4$                          | $51.7 \pm 3.2$                              |
|             | 30 %                         | $218.9 \pm 8.6$  | $67.9 \pm 0.3$                          | $101.1 \pm 2.8$                             |
|             | 45 %                         | $463.5 \pm 12.1$ | $64.0 \pm 0.4$                          | $189.9 \pm 2.7$                             |
|             | 60 %                         | $601.6 \pm 22.5$ | $61.0 \pm 0.2$                          | $223.5 \pm 7.2$                             |

|                    |      |                   |                |                  |
|--------------------|------|-------------------|----------------|------------------|
|                    | 75 % | $604.5 \pm 12.8$  | $59.8 \pm 0.3$ | $216.2 \pm 2.5$  |
|                    | 90 % | $778.5 \pm 18.7$  | $57.5 \pm 1.6$ | $331.5 \pm 8.3$  |
| <b>SWCNT-Fc-P2</b> | 15 % | $32.6 \pm 11.4$   | $69.2 \pm 1.3$ | $15.6 \pm 5.1$   |
|                    | 30 % | $184.3 \pm 29.3$  | $69.0 \pm 0.5$ | $87.8 \pm 12.9$  |
|                    | 45 % | $369.3 \pm 18.6$  | $66.6 \pm 0.4$ | $163.8 \pm 6.4$  |
|                    | 60 % | $420.1 \pm 35.1$  | $61.2 \pm 0.3$ | $157.5 \pm 11.9$ |
|                    | 75 % | $597.2 \pm 26.4$  | $59.9 \pm 0.3$ | $214.3 \pm 7.5$  |
|                    | 90 % | $754.1 \pm 32.3$  | $59.1 \pm 0.6$ | $263.3 \pm 6.1$  |
| <b>SWCNT-Fc-P3</b> | 15 % | $24.1 \pm 7.7$    | $73.6 \pm 0.4$ | $13.0 \pm 4.0$   |
|                    | 30 % | $112.6 \pm 43.8$  | $71.8 \pm 0.3$ | $58.0 \pm 8.4$   |
|                    | 45 % | $560.1 \pm 36.9$  | $67.0 \pm 0.4$ | $251.2 \pm 13.5$ |
|                    | 60 % | $605.3 \pm 29.8$  | $63.0 \pm 0.3$ | $240.2 \pm 9.6$  |
|                    | 75 % | $637.3 \pm 26.7$  | $61.7 \pm 0.2$ | $242.3 \pm 1.7$  |
|                    | 90 % | $1051.8 \pm 30.1$ | $59.1 \pm 0.3$ | $367.4 \pm 6.9$  |

Table S2. The thermoelectric performance of different polymers/SWCNT composite films from several related works.

| Materials         | Electrical conductivity<br>[S cm <sup>-1</sup> ] | Seebeck coefficient<br>[ $\mu$ V K <sup>-1</sup> ] | Power factor<br>[ $\mu$ W m <sup>-1</sup> K <sup>-2</sup> ] | Ref.      |
|-------------------|--------------------------------------------------|----------------------------------------------------|-------------------------------------------------------------|-----------|
| PANI/SWCNT        | 1390                                             | 47.4                                               | 407                                                         | 1         |
| (PEDOT:PSS)/SWCNT | 4000                                             | 19                                                 | 140                                                         | 2         |
| P3HT/SWCNT        | 1722                                             | 34                                                 | 148                                                         | 3         |
| MEH-PPV/SWCNT     | 415                                              | 29                                                 | 33                                                          | 4         |
| PEDOT-Tos/SWCNT   | 4731                                             | 16                                                 | 119                                                         | 5         |
| Fc-P3/SWCNT       | 1052                                             | 59                                                 | 367                                                         | This work |

## 4. DFT Calculations

### Computational Details

All density functional theory (DFT) calculations were performed to understand the electrochemical properties for three types of ferrocene-containing cyclopentadithiophene such as **Fc-P1**, **Fc-P2** and **Fc-P3**. The B3LYP-D3<sup>6</sup> method combined with a mixed basis sets of def2-TZVP<sup>7</sup> for Fe atom and 6-31G(d,p)<sup>8</sup> for the other atoms (designed as BS1) were used to fully optimize all the structures in gas phase. Then, vibrational frequency calculations on the fully optimized geometries were carried out at the same level of theory to confirm no imaginary frequency for all local minimum. The effect of 1,4- chlorobenzene solvent was then considered by single-point energy calculation with implicit SMD solvation model.<sup>9</sup> In order to obtain accurate binding energy for molecular dimer, the B3LYP-D3 functional in combination with large basis sets (6-311+G(d,p) & Def2-TZVP (Fe), designed as BS2) were employed in single point calculations with implicit SMD solvation model of chlorobenzene solvent. Moreover, to examine the effect of DFT functional, a few other common and reliable M06L-D3, PBE0-D3, and  $\omega$ B97X-D methods<sup>10</sup> were also used for the single-point energy calculations in SMD model of chlorobenzene solvent. In addition, non-covalent interaction (NCI) index and topological analysis based on the Quantum Theory of Atoms-In-Molecules (QTAIM) method,<sup>11</sup> HOMO-LUMO orbital and electrostatic potential (ESP) analysis on the basis of the geometry and wavefunction at B3LYP-D3/BS2 level were conducted using Multiwfn.<sup>12</sup> All 3D images of the optimized structures were prepared using GaussView 6.0, and Visual Molecular Dynamics (VMD).<sup>13</sup> All calculations were carried out by Gaussian 16 program.<sup>14</sup>

## HOMO-LUMO gap analysis

By analyzing the HOMO and LUMO orbitals energy for **Fc-P1**, **Fc-P2** and **Fc-P3**, the HOMO-LUMO energy gap of **Fc-P3** is the smallest with 2.80 eV, this is ascribed to the large cyclopentadithiophene, which is donor ligand, making the HOMO orbital energy unstable.

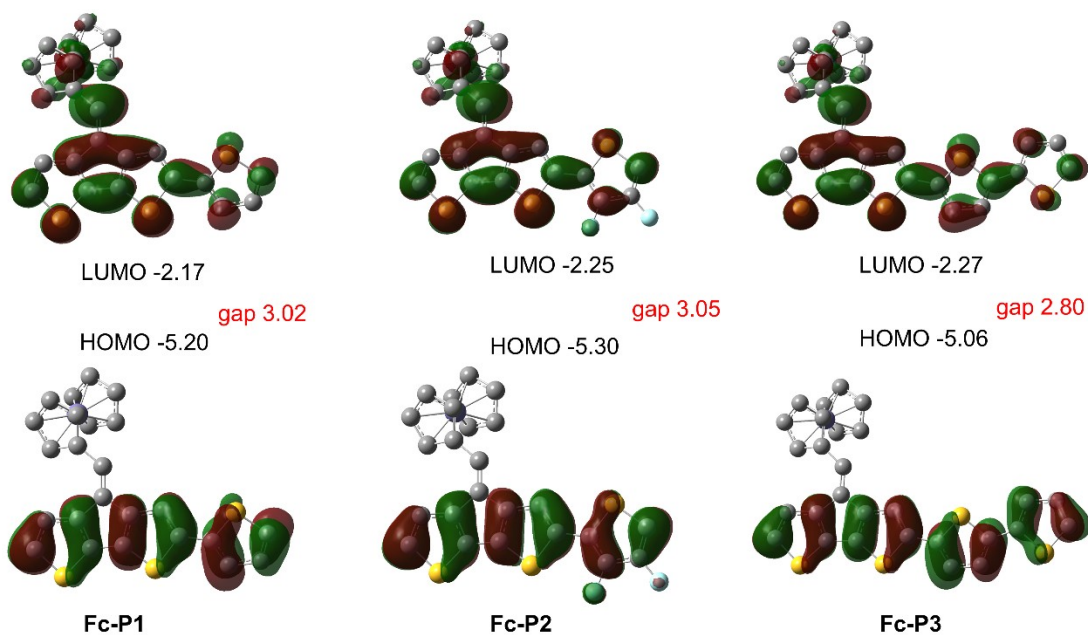

**Figure S3.** HOMO and LUMO orbital energies and corresponding HOMO-LUMO energy gaps for **Fc-P1**, **Fc-P2** and **Fc-P3**.

From Figure S4 it can be seen that the positive and negative ESP maps of **Fc-P1**, **Fc-P2** and **Fc-P3**. The large positive ESP was shown in the center of molecules, whereas the negative ESP was located on the edge. Therefore, from a pure electrostatic point of view, **Fc-P1** to **Fc-P3** molecules may be more prone to as the polymer donor.

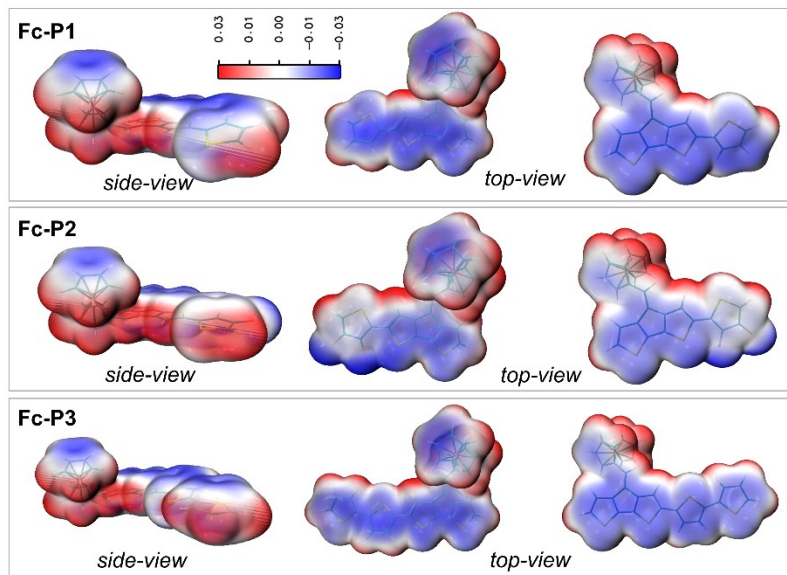

**Figure S4.** Isosurface maps of the electrostatic potential (ESP) for **Fc-P1**, **Fc-P2** and **Fc-P3** fragments. Red and blue colors correspond to positive and negative parts of ESP, respectively.

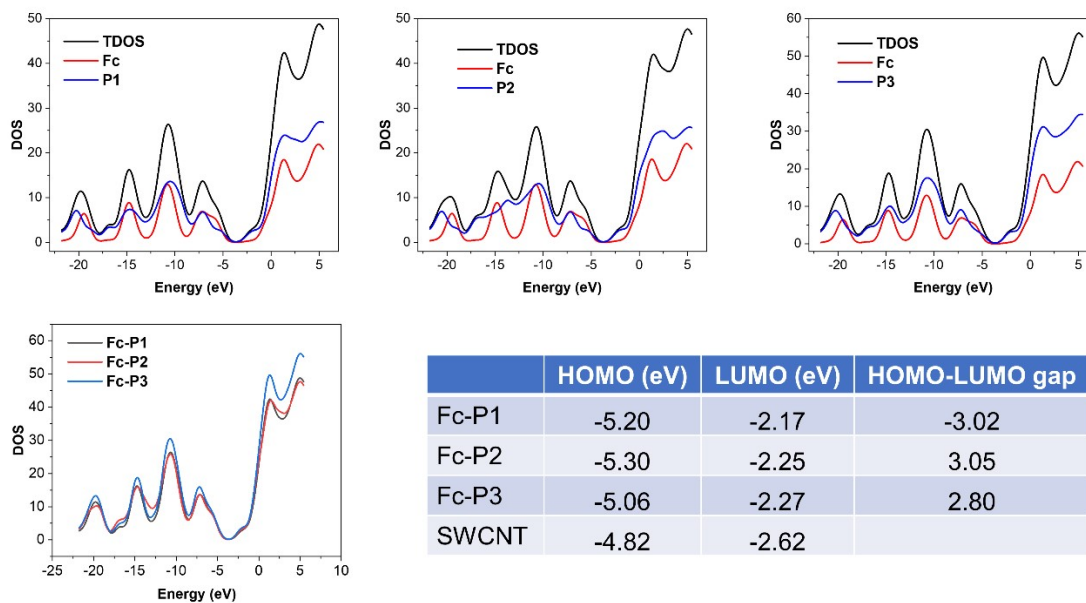

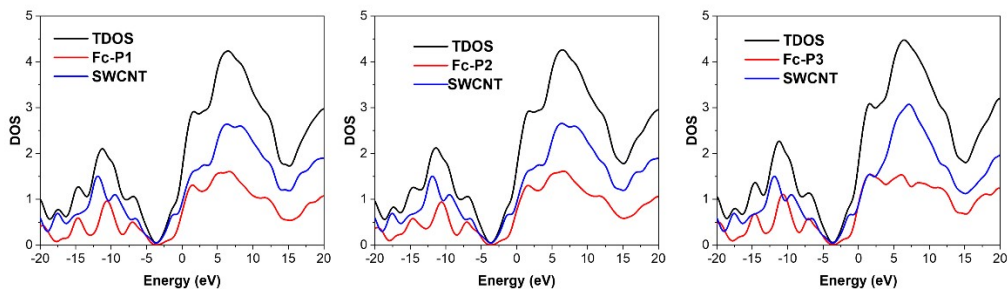

**Figure S5.** Density-of-state (DOS) map (curve) and HOMO and LUMO energies of the polymer and SWCNT fragments, as well as their complexes.

**Table S3.** Redox potentials and frontier orbital energy levels of the polymers.

| Compound     | $E_{1/2}$ ox vs. Fc <sup>+</sup> /Fc (V) | $E_{1/2}$ red vs. Fc <sup>+</sup> /Fc (V) | HOMO <sup>a</sup> (eV) | LUMO <sup>a</sup> (eV) | Energy gap <sup>a</sup> |
|--------------|------------------------------------------|-------------------------------------------|------------------------|------------------------|-------------------------|
| <b>Fc-P1</b> | 0.95                                     | -0.86                                     | -5.27                  | -3.46                  | 1.81                    |
| <b>Fc-P2</b> | 1.08                                     | -0.83                                     | -5.40                  | -3.49                  | 1.91                    |
| <b>Fc-P3</b> | 0.82                                     | -0.85                                     | -5.14                  | -3.47                  | 1.67                    |

<sup>a</sup>Measured by cyclic voltammetry in dilute dichloromethane solution.

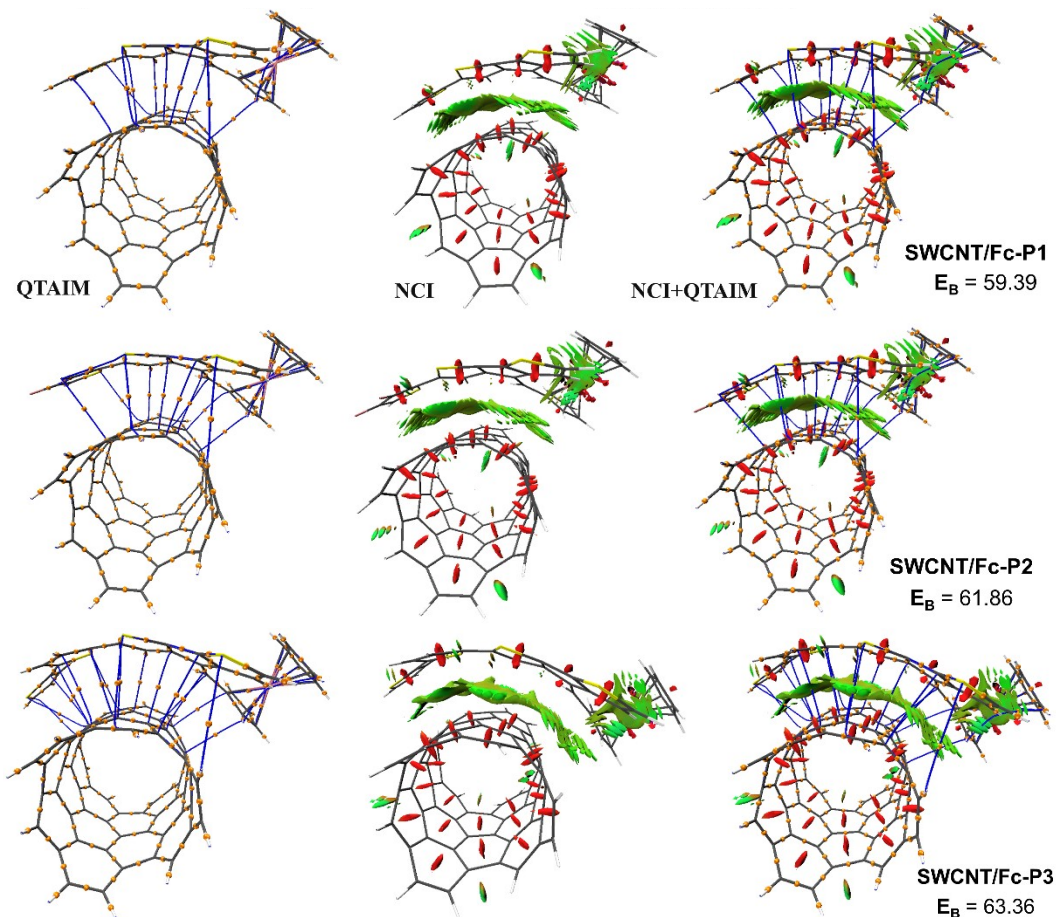



**Figure S6.** (Medium) Non-covalent interactions (NCIs) plot (red: strong repulsion; green: weak attraction; blue: strong attraction), (left) topological analysis based on the Quantum Theory of Atoms-In-Molecules (QTAIM) method; bond-critical points (BCPs) in a color sphere form based on their electron density (highest (red) and lowest (blue)); their corresponding bond paths in magenta lines, as well as (right) the NCIs combined with topological analysis of the molecule dimers (structures shown by VDW representation).

**Table S4.** Calculated binding energies (kJ/mol) of polymer fragments (**Fc-P1** to **Fc-P3**) and SWCNT using various DFT methods

| <b>E<sub>B</sub></b> | <b>B3LYP-D3</b> | <b>M06L-D3</b> | <b>PBE-D3</b> | <b>ωB97X-D</b> |
|----------------------|-----------------|----------------|---------------|----------------|
| <b>Fc-P1</b>         | 59.39           | 65.82          | 57.87         | 75.03          |
| <b>Fc-P2</b>         | 61.86           | 67.40          | 60.17         | 78.01          |
| <b>Fc-P3</b>         | 63.36           | 71.51          | 61.00         | 77.91          |

From Figure S6 and Table S2, it can be seen that the binding energies between polymer fragments and SWCNT can quantitatively explain the interaction. The interaction between **Fc-P3** and SWCNT is stronger than others, the binding energy is 63.36 kJ/mol using B3LYP-D3 method. The ordering of binding energy: **Fc-P1** < **Fc-P2** < **Fc-P3**. The calculated results are quantitatively consistent with experimental data.

**Table S5.** Cartesian coordinates

|                  |           |           |           |                  |           |           |           |
|------------------|-----------|-----------|-----------|------------------|-----------|-----------|-----------|
| <b>Fc-P1.xyz</b> |           |           | H         | -3.080596        | -0.672146 | 2.792052  |           |
| Fe               | -3.675783 | -1.068857 | 0.064319  | H                | -2.864954 | -3.748986 | -0.296255 |
| C                | -0.989541 | 0.015955  | -0.975923 | H                | -1.113995 | 5.583032  | 0.106799  |
| C                | -0.071751 | 0.924865  | -0.565158 | <b>Fc-P2.xyz</b> |           |           |           |
| C                | 1.351939  | 0.601708  | -0.343743 | C                | -1.467240 | 0.027095  | -0.986578 |
| C                | 2.013422  | 1.738802  | 0.110951  | C                | -0.577728 | 0.968597  | -0.587081 |
| C                | 1.069396  | 2.821253  | 0.170889  | C                | 0.862993  | 0.702822  | -0.402013 |
| C                | -0.186515 | 2.361314  | -0.237941 | C                | 1.489699  | 1.862504  | 0.047697  |
| S                | 1.079474  | 4.517606  | 0.495638  | C                | 0.503982  | 2.904209  | 0.138801  |
| C                | -0.614008 | 4.625896  | 0.057228  | C                | -0.741953 | 2.396204  | -0.243845 |
| C                | -1.141336 | 3.417021  | -0.315451 | S                | 0.452471  | 4.596016  | 0.482264  |
| C                | 2.189746  | -0.537028 | -0.401225 | C                | -1.253987 | 4.637682  | 0.087054  |
| C                | 3.488044  | -0.268516 | -0.008580 | C                | -1.741161 | 3.411962  | -0.285517 |
| S                | 3.681118  | 1.437185  | 0.448718  | C                | 1.748477  | -0.392048 | -0.505948 |
| C                | 4.620517  | -1.166363 | 0.049977  | C                | 3.047567  | -0.067972 | -0.151079 |
| S                | 4.639590  | -2.655716 | -0.885006 | S                | 3.175085  | 1.635995  | 0.341532  |
| C                | 6.206575  | -3.084812 | -0.269250 | C                | 4.205232  | -0.928199 | -0.157944 |
| C                | 6.689693  | -2.131788 | 0.584305  | S                | 4.118533  | -2.603032 | -0.701326 |
| C                | 5.791147  | -1.042961 | 0.768761  | C                | 5.812182  | -2.877108 | -0.395337 |
| C                | -3.365179 | -1.431120 | 2.076842  | C                | 6.396783  | -1.748014 | 0.088560  |
| H                | -0.609446 | -0.964517 | -1.259061 | C                | 5.496754  | -0.654164 | 0.222390  |
| H                | -2.165360 | 3.306243  | -0.645765 | F                | 7.688095  | -1.630567 | 0.421454  |
| H                | 1.871171  | -1.529060 | -0.701498 | F                | 5.903826  | 0.539430  | 0.686589  |
| H                | 6.671626  | -4.011684 | -0.574844 | H                | -1.054769 | -0.934769 | -1.287782 |
| H                | 7.652228  | -2.206858 | 1.076845  | H                | -2.767661 | 3.262679  | -0.591828 |
| H                | 5.986835  | -0.204295 | 1.427167  | H                | 1.464408  | -1.387090 | -0.830726 |
| C                | -4.699308 | -1.787318 | 1.713700  | H                | 6.271276  | -3.834639 | -0.587120 |
| H                | -5.604426 | -1.347494 | 2.108835  | Fe               | -4.094787 | -1.172775 | 0.086351  |
| C                | -4.624912 | -0.370682 | -1.642576 | C                | -2.831694 | -2.299674 | 1.275983  |
| C                | -4.660146 | 0.621698  | -0.616155 | C                | -3.734710 | -1.550947 | 2.087937  |
| C                | -3.318789 | 0.933464  | -0.252953 | H                | -3.459757 | -0.792978 | 2.807955  |
| C                | -2.433139 | 0.141745  | -1.064702 | C                | -5.096603 | -0.487936 | -1.595793 |
| C                | -2.470390 | -2.217443 | 1.291739  | C                | -5.151030 | 0.489319  | -0.555766 |
| C                | -3.249919 | -3.057860 | 0.440626  | C                | -3.816152 | 0.845167  | -0.209755 |
| C                | -4.628286 | -2.792594 | 0.702732  | C                | -2.915898 | 0.097026  | -1.046360 |
| H                | -5.469928 | -3.247053 | 0.198788  | C                | -3.601405 | -3.152658 | 0.428448  |
| C                | -3.262314 | -0.680198 | -1.909389 | C                | -4.981907 | -2.932751 | 0.719618  |
| H                | -2.897510 | -1.410788 | -2.618285 | C                | -5.063997 | -1.943042 | 1.744945  |
| H                | -5.483837 | -0.834079 | -2.107382 | H                | -5.974279 | -1.535884 | 2.162517  |
| H                | -5.550963 | 1.032495  | -0.161767 | C                | -3.728294 | -0.744355 | -1.888265 |
| H                | -3.011717 | 1.597056  | 0.540984  | H                | -3.348994 | -1.451798 | -2.612835 |
| H                | -1.391338 | -2.146998 | 1.303255  | H                | -5.945667 | -0.976480 | -2.052903 |

H -6.048661 0.861207 -0.081706  
H -3.520342 1.509203 0.588077  
H -3.209933 -3.822644 -0.324362  
H -1.755143 -2.197462 1.269429  
H -5.818887 -3.405987 0.225336  
H -1.791301 5.573031 0.158024

### Fc-P3.xyz

Fe -4.383182 -2.076498 0.088078  
C -2.272186 -0.092632 -0.953098  
C -1.789524 1.117684 -0.579731  
C -0.361396 1.377706 -0.308924  
C -0.205517 2.703913 0.086566  
C -1.492352 3.341861 0.058012  
C -2.458415 2.414121 -0.346068  
S -2.145994 4.925829 0.275740  
C -3.731579 4.352033 -0.202062  
C -3.740137 3.016119 -0.508429  
C 0.848943 0.648332 -0.279357  
C 1.929659 1.415359 0.121773  
S 1.434067 3.085373 0.476691  
C 3.311452 1.026180 0.259159  
S 3.910140 -0.446891 -0.492952  
C 5.525359 -0.195489 0.154109  
C 5.572453 0.981666 0.871433  
C 4.334600 1.665815 0.931404  
C -4.044129 -2.208334 2.124590  
H -1.535227 -0.864994 -1.168249  
H -4.628967 2.503590 -0.850888  
H 0.946154 -0.403471 -0.524350  
H 6.472185 1.327049 1.367920  
H 4.186992 2.589585 1.479052  
C -5.123923 -3.063997 1.749881  
H -6.144388 -2.989438 2.099020  
C -5.456699 -1.867273 -1.674234  
C -5.908099 -0.920540 -0.704914  
C -4.801915 -0.105114 -0.331178  
C -3.649742 -0.532897 -1.079317  
C -2.884088 -2.622598 1.404890  
C -3.246032 -3.732229 0.582636  
C -4.630982 -4.005740 0.797147  
H -5.212745 -4.768689 0.298868  
C -4.069091 -1.644591 -1.894751  
H -3.425742 -2.210302 -2.554625  
H -6.055449 -2.642940 -2.130717  
H -6.905822 -0.861990 -0.292755

H -4.802144 0.658747 0.431447  
H -1.915392 -2.143061 1.438194  
H -4.102210 -1.369620 2.804100  
H -2.595069 -4.252307 -0.106285  
C 6.580687 -1.151482 -0.099418  
C 6.480810 -2.463167 -0.514230  
S 8.269510 -0.707044 0.101721  
C 7.739722 -3.110859 -0.660096  
H 5.528028 -2.950312 -0.687498  
C 8.796395 -2.297043 -0.356672  
H 7.853046 -4.143267 -0.969716  
H 9.851685 -2.531231 -0.374442  
H -4.561398 5.044508 -0.223051

### SWCNT-FcP1.xyz

C 0.622916 0.326145 -4.216649  
C -0.257893 1.143868 -3.415046  
C 0.404945 1.163395 0.823024  
C -1.509841 1.548261 -3.884298  
C -2.555584 1.793578 -2.958289  
C 0.012341 1.193136 -2.010264  
C -0.856811 1.926382 -1.164556  
C -0.549663 2.040914 0.238077  
C -1.463374 2.693569 1.102494  
C -0.040117 2.144213 3.011824  
C -4.229444 0.564407 -4.415803  
C -3.857357 1.196120 -3.172532  
C -4.559536 0.785658 -2.011226  
C -2.187084 2.148392 -1.615594  
C -3.192623 2.253470 -0.601123  
C -2.843438 2.710036 0.713037  
C -3.820567 2.738650 1.739039  
C -1.117991 2.858390 2.481918  
C -2.120416 3.447909 3.337638  
C -4.838874 -0.655364 -4.419901  
C -5.038939 -1.348413 -3.168418  
C -5.095559 -0.544535 -1.984878  
C -5.206031 -1.182980 -0.723274  
C -4.353408 1.467609 -0.766290  
C -5.000081 1.002930 0.424151  
C -4.875300 1.750485 1.644815  
C -5.395251 1.168141 2.827780  
C -3.435493 3.352133 2.987564  
C -2.683406 -4.756261 -2.917497  
C -4.801557 -2.720011 -3.055903  
C -4.408155 -3.262841 -1.807393

|   |           |           |           |    |           |           |           |
|---|-----------|-----------|-----------|----|-----------|-----------|-----------|
| C | -4.764675 | -2.533650 | -0.622184 | H  | -1.746471 | 1.348917  | -4.924101 |
| C | -4.257071 | -2.948931 | 0.650739  | H  | -3.924975 | 1.016244  | -5.354999 |
| C | -5.327904 | -0.382701 | 0.470138  | H  | -5.019132 | -1.178905 | -5.354671 |
| C | -5.339181 | -1.017086 | 1.738441  | H  | -4.606404 | -3.272960 | -3.968643 |
| C | -5.523449 | -0.219768 | 2.913458  | H  | -3.321350 | -5.091127 | -3.729759 |
| C | -5.441495 | -0.900563 | 4.184611  | H  | -0.884194 | -5.108708 | -4.005182 |
| C | -1.328682 | -4.770125 | -3.073403 | H  | 0.873325  | -3.330417 | -3.510283 |
| C | -0.498770 | -4.121298 | -2.085268 | Fe | 6.198503  | -1.924665 | -0.646156 |
| C | -3.281645 | -4.170552 | -1.742057 | C  | 4.078098  | 0.446173  | -1.071087 |
| C | -2.466596 | -4.079917 | -0.586311 | C  | 3.890531  | 1.300978  | -0.034894 |
| C | -3.029961 | -3.646260 | 0.659542  | C  | 3.193874  | 2.593854  | -0.193144 |
| C | -2.192088 | -3.479235 | 1.809071  | C  | 3.004673  | 3.170777  | 1.061104  |
| C | -4.694963 | -2.293578 | 1.848643  | C  | 3.598635  | 2.309796  | 2.046448  |
| C | -4.135793 | -2.652152 | 3.100663  | C  | 4.127643  | 1.178003  | 1.416242  |
| C | -4.733003 | -2.062244 | 4.274423  | S  | 3.802464  | 2.266798  | 3.760230  |
| C | 0.584560  | -3.324164 | -2.464515 | C  | 4.628582  | 0.724319  | 3.639440  |
| C | 0.981939  | -2.248902 | -1.633114 | C  | 4.732192  | 0.283243  | 2.346148  |
| C | -1.047347 | -3.983161 | -0.769892 | C  | 2.431755  | 3.220498  | -1.207363 |
| C | -0.307764 | -3.278172 | 0.214152  | C  | 1.651186  | 4.255265  | -0.727234 |
| C | -0.820967 | -3.183924 | 1.559470  | S  | 1.907571  | 4.503649  | 1.010598  |
| C | -0.131190 | -2.397948 | 2.517870  | C  | 0.608136  | 4.978970  | -1.417372 |
| C | -2.776277 | -3.150023 | 3.079599  | S  | 0.560045  | 5.051968  | -3.171270 |
| C | -1.896507 | -2.835193 | 4.146206  | C  | -0.972401 | 5.867994  | -3.147424 |
| C | 1.296462  | -0.706708 | -3.629843 | C  | -1.409521 | 6.082649  | -1.868837 |
| C | 1.195277  | -0.937419 | -2.209643 | C  | -0.516421 | 5.575794  | -0.884021 |
| C | 0.810625  | 0.166919  | -1.411320 | C  | 7.443290  | -1.788339 | 1.007730  |
| C | 0.653590  | -2.330792 | -0.237377 | H  | 3.854755  | 0.846984  | -2.058156 |
| C | 0.886728  | -1.204711 | 0.616774  | H  | 5.215693  | -0.643922 | 2.076257  |
| C | 0.670324  | -1.312812 | 2.029389  | H  | 2.363434  | 2.875866  | -2.231905 |
| C | 0.825139  | -0.175174 | 2.860647  | H  | -1.454264 | 6.139204  | -4.076317 |
| C | -0.614967 | -2.357655 | 3.865093  | H  | -2.348789 | 6.569706  | -1.634335 |
| C | 0.074477  | -1.474996 | 4.780022  | H  | -0.717349 | 5.594323  | 0.180574  |
| C | 0.849748  | 0.070120  | 0.017409  | C  | 7.867611  | -2.852939 | 0.157196  |
| C | 0.552985  | 1.107390  | 2.250162  | H  | 7.915096  | -3.899492 | 0.424123  |
| C | 0.742452  | -0.394385 | 4.285080  | C  | 5.011859  | -3.044310 | -1.932229 |
| H | -0.085317 | -1.583588 | 5.849183  | C  | 4.578006  | -3.226834 | -0.584832 |
| H | 1.128061  | 0.363744  | 4.959566  | C  | 4.213863  | -1.958444 | -0.057845 |
| H | 0.109156  | 2.174409  | 4.085618  | C  | 4.409570  | -0.967223 | -1.083684 |
| H | -1.836710 | 3.808297  | 4.322531  | C  | 7.483959  | -0.576169 | 0.255268  |
| H | -4.203268 | 3.640415  | 3.699172  | C  | 7.938042  | -0.891279 | -1.060528 |
| H | -5.797446 | -0.400998 | 5.081326  | C  | 8.176977  | -2.297740 | -1.120492 |
| H | -4.527815 | -2.492278 | 5.250027  | H  | 8.497056  | -2.851474 | -1.992337 |
| H | -5.379307 | 1.729751  | 3.755822  | C  | 4.905529  | -1.661397 | -2.240800 |
| H | -2.297692 | -2.645501 | 5.136174  | H  | 5.178044  | -1.189663 | -3.175347 |
| H | 1.831165  | -1.422246 | -4.247079 | H  | 5.388998  | -3.815794 | -2.589015 |
| H | 0.613460  | 0.433533  | -5.297779 | H  | 4.552902  | -4.163852 | -0.046452 |

H 3.805253 -1.771903 0.922045  
H 7.171342 0.398056 0.604727  
H 7.126021 -1.889897 2.036053  
H 8.042496 -0.193199 -1.879366  
H 4.985325 0.241619 4.538358

**SWCNT-FcP2.xyz**

C -2.289739 3.291101 3.229589  
C -1.245876 2.720376 2.412451  
C -2.197568 1.844119 -1.681716  
C -0.148260 2.072202 2.983998  
C 0.510523 1.043746 2.265300  
C -1.554803 2.498988 1.032830  
C -0.595391 1.863713 0.206595  
C -0.868201 1.694036 -1.198114  
C 0.051349 0.978454 -2.005286  
C -1.447881 1.207503 -3.917758  
C 0.729228 -0.386867 4.347914  
C 0.830020 -0.206068 2.919208  
C 0.745143 -1.373872 2.120181  
C 0.388821 1.050425 0.834798  
C 0.900748 -0.043504 0.070826  
C 0.884574 0.008694 -1.360783  
C 1.334414 -1.099730 -2.118061  
C -0.188671 0.874656 -3.412779  
C 0.744947 0.075817 -4.172841  
C 0.101321 -1.482044 4.862797  
C -0.529000 -2.421657 3.962137  
C -0.016752 -2.479405 2.626070  
C -0.651585 -3.323466 1.679152  
C 0.985143 -1.297414 0.709245  
C 0.819474 -2.457749 -0.114667  
C 1.170582 -2.402052 -1.506144  
C 0.838907 -3.518340 -2.311876  
C 1.453183 -0.906783 -3.542436  
C -4.663867 -2.300707 4.285182  
C -1.793441 -2.947813 4.233406  
C -2.636761 -3.333344 3.160576  
C -2.012987 -3.672871 1.911788  
C -2.819361 -3.911460 0.752443  
C -0.107804 -3.433916 0.347229  
C -0.795465 -4.200067 -0.628789  
C -0.215053 -4.352206 -1.928867  
C -0.995045 -5.067244 -2.911942  
C -5.422568 -1.176073 4.146822  
C -5.510738 -0.537922 2.854168

C -4.017260 -2.896998 3.141181  
C -4.567051 -2.601670 1.868651  
C -4.076243 -3.271493 0.699632  
C -4.577223 -2.918327 -0.594478  
C -2.212344 -4.355628 -0.468905  
C -2.999294 -4.517756 -1.636245  
C -2.351906 -5.110184 -2.781857  
C -5.445232 0.851228 2.728316  
C -4.929719 1.421837 1.537630  
C -5.266611 -1.360322 1.707650  
C -5.260170 -0.764285 0.420899  
C -5.078161 -1.593230 -0.744958  
C -4.972485 -0.988286 -2.023401  
C -4.164426 -3.665187 -1.750075  
C -4.557621 -3.178692 -3.021659  
C -3.591641 3.127324 2.857586  
C -3.923133 2.459620 1.621664  
C -2.925271 2.444745 0.615672  
C -4.996126 0.633234 0.338393  
C -4.348001 1.091723 -0.853538  
C -4.497271 0.363894 -2.080421  
C -3.791691 0.771528 -3.240607  
C -4.855266 -1.823537 -3.180484  
C -4.662292 -1.159592 -4.448768  
C -3.227350 1.934112 -0.690143  
C -2.522305 1.432897 -3.019842  
C -4.109472 0.086639 -4.470685  
H -4.800059 -1.718433 -5.370221  
H -3.807387 0.523964 -5.417520  
H -1.654596 0.964280 -4.954663  
H 0.751799 0.150256 -5.256800  
H 2.033660 -1.614139 -4.126775  
H -0.517257 -5.412917 -3.824433  
H -2.957728 -5.497839 -3.595231  
H 1.148444 -3.541976 -3.351427  
H -4.319578 -3.749016 -3.913277  
H -4.386211 3.404432 3.543623  
H -2.041590 3.696027 4.206597  
H -0.023182 2.140624 4.059205  
H 1.065329 0.407865 5.006632  
H -0.074890 -1.566343 5.931564  
H -2.222434 -2.747468 5.209516  
H -4.458675 -2.691641 5.277089  
H -5.818585 -0.667055 5.021127  
H -5.474015 1.440770 3.638528  
Fe 6.365047 -1.730446 -0.670602

|                       |           |           |           |   |           |           |           |
|-----------------------|-----------|-----------|-----------|---|-----------|-----------|-----------|
| C                     | 4.115509  | 0.524497  | -1.083806 | C | -4.891293 | -1.086334 | -3.010089 |
| C                     | 3.888369  | 1.365961  | -0.044805 | C | -4.617538 | -0.748347 | 1.262167  |
| C                     | 3.117970  | 2.617846  | -0.192590 | C | -4.430657 | -2.263974 | -3.602228 |
| C                     | 2.910353  | 3.182652  | 1.065327  | C | -3.764628 | -3.234170 | -2.811509 |
| C                     | 3.559036  | 2.352401  | 2.042307  | C | -4.877348 | -0.966050 | -1.583133 |
| C                     | 4.143735  | 1.253226  | 1.403861  | C | -4.683934 | -2.128690 | -0.794164 |
| S                     | 3.778501  | 2.315878  | 3.754263  | C | -4.728318 | -2.027169 | 0.644022  |
| C                     | 4.686747  | 0.821963  | 3.621087  | C | -4.439315 | -3.168573 | 1.434519  |
| C                     | 4.804115  | 0.390233  | 2.325813  | C | -4.636667 | -1.814738 | 3.457988  |
| C                     | 2.303000  | 3.195162  | -1.191644 | C | -2.039443 | -3.642686 | -4.627018 |
| C                     | 1.462970  | 4.176906  | -0.694603 | C | -2.520789 | -3.811273 | -3.277170 |
| S                     | 1.721720  | 4.431266  | 1.042436  | C | -1.553569 | -4.110954 | -2.285300 |
| C                     | 0.366515  | 4.812317  | -1.383244 | C | -4.031693 | -3.240975 | -1.400043 |
| S                     | 0.183583  | 4.707677  | -3.130037 | C | -3.269500 | -4.088667 | -0.533113 |
| C                     | -1.398898 | 5.429852  | -3.090303 | C | -3.602099 | -4.180693 | 0.858881  |
| C                     | -1.749397 | 5.741808  | -1.812195 | C | -2.802040 | -4.959861 | 1.731629  |
| C                     | -0.758463 | 5.398119  | -0.852393 | C | -4.546603 | -3.073212 | 2.859327  |
| C                     | 7.610652  | -1.534182 | 0.977069  | C | -4.161546 | -4.237107 | 3.622919  |
| H                     | 3.862536  | 0.912540  | -2.068908 | C | -0.737746 | -3.312440 | -4.864582 |
| H                     | 5.334942  | -0.508454 | 2.048823  | C | 0.139303  | -3.053169 | -3.746750 |
| H                     | 2.243222  | 2.845778  | -2.215175 | C | -0.209107 | -3.658523 | -2.496822 |
| H                     | -1.965685 | 5.596459  | -3.993177 | C | 0.571276  | -3.365893 | -1.348730 |
| C                     | 8.084205  | -2.573373 | 0.121180  | C | -1.967476 | -4.437693 | -0.951540 |
| H                     | 8.186960  | -3.616765 | 0.384860  | C | -0.989768 | -4.663103 | 0.070770  |
| C                     | 5.234849  | -2.908434 | -1.955028 | C | -1.404932 | -5.095647 | 1.376234  |
| C                     | 4.815200  | -3.116436 | -0.606797 | C | -0.421493 | -5.145255 | 2.396480  |
| C                     | 4.386157  | -1.870230 | -0.075920 | C | -3.283622 | -5.128968 | 3.081359  |
| C                     | 4.526055  | -0.868043 | -1.100054 | C | 1.145773  | 0.961113  | -3.547544 |
| C                     | 7.584653  | -0.319615 | 0.227803  | C | 1.028438  | -1.975427 | -3.762982 |
| C                     | 8.046637  | -0.607607 | -1.091396 | C | 1.396465  | -1.359040 | -2.541904 |
| C                     | 8.357261  | -1.999747 | -1.156627 | C | 1.308344  | -2.148095 | -1.345397 |
| H                     | 8.700343  | -2.534060 | -2.031826 | C | 1.509519  | -1.530763 | -0.068047 |
| C                     | 5.054574  | -1.532335 | -2.260218 | C | 0.268453  | -4.016466 | -0.096995 |
| H                     | 5.298562  | -1.044816 | -3.194525 | C | 0.983689  | -3.651152 | 1.072506  |
| H                     | 5.650620  | -3.657447 | -2.614517 | C | 0.717834  | -4.344158 | 2.296995  |
| H                     | 4.840959  | -4.054637 | -0.070547 | C | 1.410368  | -3.874207 | 3.476435  |
| H                     | 3.969850  | -1.707695 | 0.905138  | C | 0.230373  | 1.973792  | -3.507957 |
| H                     | 7.224809  | 0.636366  | 0.582183  | C | -0.620752 | 2.115767  | -2.350198 |
| H                     | 7.305340  | -1.654522 | 2.007000  | C | 1.317722  | 0.081943  | -2.417236 |
| H                     | 8.110457  | 0.096969  | -1.908842 | C | 0.904155  | 0.577628  | -1.156770 |
| H                     | 5.075753  | 0.356377  | 4.515685  | C | 1.189905  | -0.162196 | 0.036707  |
| F                     | -0.956329 | 5.591384  | 0.462357  | C | 0.721145  | 0.308048  | 1.303066  |
| F                     | -2.905955 | 6.308642  | -1.446880 | C | 1.537201  | -2.328165 | 1.122673  |
| <b>SWCNT-FcP3.xyz</b> |           |           |           | C | 1.657825  | -1.706430 | 2.391005  |
| C                     | -5.009403 | 0.139924  | -3.767409 | C | 1.832333  | -2.578744 | 3.528241  |
|                       |           |           |           | C | -1.977060 | 2.428214  | -2.469377 |



|   |           |           |           |   |           |           |           |
|---|-----------|-----------|-----------|---|-----------|-----------|-----------|
| C | 0.954343  | 3.071185  | 0.669757  | C | -2.308210 | 2.482745  | -1.981408 |
| C | -3.347234 | 1.386561  | 2.828242  | C | -1.747910 | -0.014860 | -3.134669 |
| C | -2.308061 | 0.474636  | 3.140813  | C | -0.680355 | 0.905648  | -2.981329 |
| C | -1.747811 | 2.722292  | 1.554570  | C | 0.680268  | 0.439643  | -3.084831 |
| C | -0.680262 | 2.129252  | 2.275096  | C | 1.747800  | 1.338655  | -2.834438 |
| C | 0.680348  | 2.451758  | 1.923098  | C | 2.308110  | -1.412340 | -2.845361 |
| C | 1.747909  | 1.785480  | 2.576485  | C | 3.347295  | -0.485932 | -3.111936 |
| C | 3.347343  | 2.938364  | 1.135208  | C | -3.887233 | 3.300181  | -0.171393 |
| C | -3.887106 | -1.501603 | 2.943886  | C | -2.559788 | 3.133867  | -0.713160 |
| C | -2.559645 | -0.949249 | 3.070616  | C | -1.484929 | 3.147127  | 0.210321  |
| C | -1.484814 | -1.755581 | 2.620189  | C | -0.954389 | 2.131775  | -2.309634 |
| C | -0.954244 | 0.934377  | 3.000954  | C | 0.130811  | 2.719884  | -1.584509 |
| C | 0.130979  | 0.012314  | 3.147578  | C | 1.484850  | 2.457507  | -1.976805 |
| C | 1.485012  | 0.483244  | 3.116537  | C | 2.559685  | 2.976541  | -1.212818 |
| C | 2.559852  | -0.437871 | 3.183797  | C | 3.095092  | 0.882771  | -3.000175 |
| C | 3.095177  | 2.157092  | 2.264595  | C | 4.146184  | 1.810118  | -2.650900 |
| C | 4.146326  | 1.390857  | 2.892866  | C | -0.130883 | 3.137117  | -0.261547 |
| C | -4.146179 | -2.483542 | 2.034022  | C | 2.308150  | 3.170553  | 0.199563  |
| C | -3.095100 | -2.912274 | 1.140628  | C | 3.887120  | 2.802173  | -1.752088 |
| C | -1.747793 | -2.707387 | 1.580285  | H | 5.164110  | 1.609435  | -2.973122 |
| C | -0.680298 | -3.035006 | 0.706413  | H | 4.704780  | 3.398610  | -1.358955 |
| C | -0.130739 | -1.342017 | 2.847458  | H | 4.381462  | 3.069268  | 0.834656  |
| C | 0.954422  | -2.115687 | 2.324735  | H | 5.164246  | 1.770273  | 2.880166  |
| C | 2.308266  | -1.758092 | 2.645693  | H | 4.705007  | -0.522345 | 3.622184  |
| C | 3.347382  | -2.452401 | 1.976790  | H | 5.164154  | -3.379767 | 0.092648  |
| C | 3.887308  | 0.116360  | 3.302377  | H | 4.704764  | -2.876063 | -2.263827 |
| C | -3.887306 | -1.798502 | -2.772221 | H | 4.381535  | -2.257842 | 2.240490  |
| C | -3.347336 | -3.142697 | -0.213171 | H | 4.381409  | -0.811675 | -3.074990 |
| C | -2.308233 | -2.957359 | -1.159275 | H | -4.704946 | 3.563112  | -0.835519 |
| C | -0.954387 | -3.066214 | -0.691310 | H | -5.164148 | 3.023467  | 1.513011  |
| C | 0.130775  | -2.732287 | -1.563259 | H | -4.381345 | 1.098532  | 2.984803  |
| C | 0.680344  | -2.891580 | 1.161681  | H | -4.704747 | -1.057936 | 3.503773  |
| C | 1.747823  | -3.124292 | 0.257882  | H | -5.164098 | -2.822069 | 1.862225  |
| C | 3.095139  | -3.039912 | 0.735554  | H | -4.381487 | -3.134544 | -0.540776 |
| C | 4.146228  | -3.200979 | -0.242211 | H | -4.705020 | -2.505112 | -2.667839 |
| C | -4.146337 | -0.519569 | -3.167666 | H | -5.164265 | -0.201457 | -3.374803 |
| C | -3.095190 | 0.468430  | -3.092266 | H | -4.381505 | 2.035746  | -2.443949 |
| C | -2.559849 | -2.184531 | -2.357284 |   |           |           |           |
| C | -1.484997 | -1.391415 | -2.830545 |   |           |           |           |
| C | -0.130933 | -1.795054 | -2.585977 |   |           |           |           |
| C | 0.954280  | -0.955526 | -2.994485 |   |           |           |           |
| C | 1.484831  | -2.940819 | -1.139896 |   |           |           |           |
| C | 2.559666  | -2.538556 | -1.971294 |   |           |           |           |
| C | 3.887132  | -2.918388 | -1.550707 |   |           |           |           |
| C | -3.347369 | 1.756097  | -2.614925 |   |           |           |           |



## References

- [1]. A. Dash, D. Scheunemann, M. Kemerink, Comprehensive model for the thermoelectric properties of two-dimensional carbon nanotube networks. *Phys. Rev. Appl.* 2022, **18**, 064022.
- [2]. T. Mukhopadhyaya, T. D. Lee, C. Ganley, S. Tanwar, P. Raj, L. Li, Y. Song, P. Clancy, S. Thon, H. E. Katz, Stable high-conductivity ethylenedioxythiophene polymers via borane-adduct doping. *Adv. Funct. Mater.* 2022, **32**, 2208541.
- [3]. H. Li, Y. Liu, P. Li, S. Liu, F. Du, C. He, Enhanced thermoelectric performance of carbon nanotubes/polyaniline composites by multiple interface engineering. *ACS Appl. Mater. Interfaces* 2021, **13**, 6650.
- [4]. G. P. Moriarty, S. De, P. J. King, U. Khan, M. Via, J. A. King, J. N. Coleman, J. C. Grunlan, Thermoelectric behavior of organic thin film nanocomposites. *J Polym Sci Pol Phys* 2013, **51**, 119.
- [5]. M. Tonga, L. Wei, E. Wilusz, L. K.-Karasz, F. E. Karasz, P. M. Lahti, Solution-fabrication dependent thermoelectric behavior of iodine-doped regioregular and regiorandom P3HT/carbon nanotube composite. *Synth Met* 2018, **239**, 51.
- [6]. (a) C. Lee, W. Yang, R. G. Parr, Development of the Colle-Salvetti correlation-energy formula into a functional of the electron density. *Phys. Rev. B* 1988, **37**, 785; (b) A. D. Becke, Density-functional thermochemistry. III. The role of exact exchange. *J. Chem. Phys.* 1993, **98**, 5648; (c) S. Grimme, J. Antony, S. Ehrlich, H. Krieg, A consistent and accurate ab initio parametrization of density functional dispersion correction (DFT-D) for the 94 elements H-Pu. *J. Chem. Phys.* 2010, **132**, 154104.
- [7]. M. Dolg, U. Wedig, H. Stoll, H. Preuss, Energy-adjusted ab initio pseudopotentials for the first-row transition elements. *J. Chem. Phys.* 1987, **86**, 866.
- [8]. (a) R. Ditchfield, W. J. Hehre, J. A. Pople, Self-Consistent Molecular-Orbital Methods. IX. An Extended Gaussian-Type Basis for Molecular-Orbital Studies of Organic Molecules. *J. Chem. Phys.* 1971, **54**, 724; (b) W. J. Hehre, R. Ditchfield, J. A. Pople, Self-Consistent Molecular Orbital Methods. XII. Further Extensions of Gaussian-Type Basis Sets for Use in Molecular Orbital Studies of Organic Molecules. *J. Chem. Phys.* 1972, **56**, 2257; (c) P. C. Hariharan, J. A. Pople, The influence of polarization functions on molecular orbital hydrogenation energies. *Theor. Chem. Acc.* 1973, **28**, 213.
- [9]. A. V. Marenich, C. J. Cramer, D. G. Truhlar, Universal solvation model based on solute electron density and on a continuum model of the solvent defined by the bulk dielectric constant and atomic surface tensions. *J. Phys. Chem. B* 2009, **113**, 6378.

- [10]. (a) Y. Zhao, D. G. Truhlar, A new local density functional for main-group thermochemistry, transition metal bonding, thermochemical kinetics, and noncovalent interactions. *J. Chem. Phys.* 2006, **125**, 194101; (b) J.-D. Chai, M. Head-Gordon, Systematic optimization of long-range corrected hybrid density functionals. *J. Chem. Phys.* 2008, **128**, 084106; (c) C. Adamo, V. Barone, Toward Reliable Density Functional Methods without Adjustable Parameters: The PBE0 Model. *J. Chem. Phys.* 1999, **110**, 6158.
- [11]. (a) Johnson, E. R.; Keinan, S.; Mori-Sánchez, P.; Contreras-García, J.; Cohen, A. J.; Yang, W. Revealing Noncovalent Interactions. *J. Am. Chem. Soc.* 2010, **132**, 6498. (b) Bader, R. F. W. Clarendon Press: Oxford. Clarendon Press: Oxford, U.K. 1990.
- [12]. Lu, T.; Chen, F. Multiwfn: A multifunctional wavefunction analyzer. *J. Comput. Chem.* 2012, **33**, 580.
- [13]. Humphrey, W.; Dalke, A.; Schulten, K. VMD-Visual Molecular Dynamics, *J. Molec. Graphics* 1996, **14**, 33.
- [14]. Gaussian 16, Revision A.03, M. J. Frisch, G. W. Trucks, H. B. Schlegel, G. E. Scuseria, M. A. Robb, J. R. Cheeseman, G. Scalmani, V. Barone, G. A. Petersson, H. Nakatsuji, X. Li, M. Caricato, A. V. Marenich, J. Bloino, B. G. Janesko, R. Gomperts, B. Mennucci, H. P. Hratchian, J. V. Ortiz, A. F. Izmaylov, J. L. Sonnenberg, D. Williams-Young, F. Ding, F. Lipparini, F. Egidi, J. Goings, B. Peng, A. Petrone, T. Henderson, D. Ranasinghe, V. G. Zakrzewski, J. Gao, N. Rega, G. Zheng, W. Liang, M. Hada, M. Ehara, K. Toyota, R. Fukuda, J. Hasegawa, M. Ishida, T. Nakajima, Y. Honda, O. Kitao, H. Nakai, T. Vreven, K. Throssell, J. A. Montgomery, Jr., J. E. Peralta, F. Ogliaro, M. J. Bearpark, J. J. Heyd, E. N. Brothers, K. N. Kudin, V. N. Staroverov, T. A. Keith, R. Kobayashi, J. Normand, K. Raghavachari, A. P. Rendell, J. C. Burant, S. S. Iyengar, J. Tomasi, M. Cossi, J. M. Millam, M. Klene, C. Adamo, R. Cammi, J. W. Ochterski, R. L. Martin, K. Morokuma, O. Farkas, J. B. Foresman, and D. J. Fox, Gaussian, Inc., Wallingford CT, 2016.
